# Supplementary material for: Homologous desensitization of guanylyl cyclase A, the receptor for atrial natriuretic peptide, is associated with a complex phosphorylation pattern
Source: PubMed Central journal article supplement (PMC2901513; doi:10.1111/j.1742-4658.2010.07658.x), 2010-06
Supplement: ejb0277-2440-SD3.pdf [file ejb0277-2440-SD3.pdf]

**Supplementary Fig. S3.** Fragment ion spectra of all identified tryptic GC-A phosphopeptides obtained from GC-A, endogenously expressed in murine microvascular myocardial endothelial cells. Note that ion masses within the included tables can refer to intact b- and y-ions and to b- and y-ions after  $\beta$ -elimination of phosphoric acid. \*, neutral loss of  $\text{NH}_3$ ; <sup>0</sup>, neutral loss of  $\text{H}_2\text{O}$ .

# Mascot Search Results

## Peptide View

MS/MS Fragmentation of **WEDLQPSSLER**

Found in **IPI00111183**, Tax\_Id=10090 Gene\_Symbol=Npr1 Atrial natriuretic peptide receptor A

Match to Query 729: 1438.613724 from(720.314138,2+)

Title: orbitrap002312.1333.1333.2.dta

Data file C:\Dokumente und Einstellungen\Juliane\Eigene Dateien\Orbitrap-Files\orbitrap002312.RAW.mgf

Click mouse within plot area to zoom in by factor of two about that point

Or,   to  Da

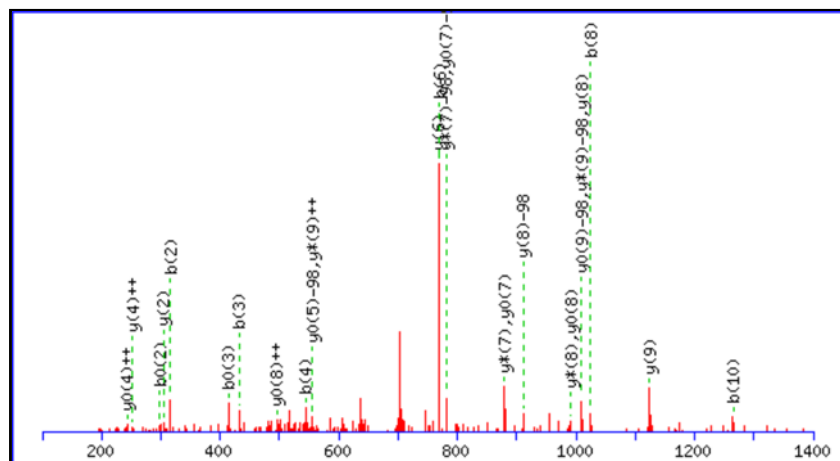

Monoisotopic mass of neutral peptide  $M_r(\text{calc})$ : 1438.6129

Fixed modifications: Carbamidomethyl (C)

Variable modifications:

S7 : Phospho (ST), with neutral losses 0.0000 (shown in table), 97.9769

Ions Score: 31 Expect: 0.024

Matches (Bold Red): 26/168 fragment ions using 43 most intense peaks

| #  | b                | b <sup>++</sup> | b*        | b <sup>*++</sup> | b <sup>0</sup>  | b <sup>0++</sup> | Seq. | y                | y <sup>++</sup> | y*              | y <sup>*++</sup> | y <sup>0</sup>  | y <sup>0++</sup> | #  |
|----|------------------|-----------------|-----------|------------------|-----------------|------------------|------|------------------|-----------------|-----------------|------------------|-----------------|------------------|----|
| 1  | 187.0866         | 94.0469         |           |                  |                 |                  | W    |                  |                 |                 |                  |                 |                  | 11 |
| 2  | <b>316.1292</b>  | 158.5682        |           |                  | <b>298.1186</b> | 149.5629         | E    | 1253.5409        | 627.2741        | 1236.5144       | 618.7608         | 1235.5304       | 618.2688         | 10 |
| 3  | <b>431.1561</b>  | 216.0817        |           |                  | <b>413.1456</b> | 207.0764         | D    | <b>1124.4983</b> | 562.7528        | 1107.4718       | <b>554.2395</b>  | 1106.4878       | 553.7475         | 9  |
| 4  | <b>544.2402</b>  | 272.6237        |           |                  | 526.2296        | 263.6185         | L    | <b>1009.4714</b> | 505.2393        | <b>992.4448</b> | 496.7261         | <b>991.4608</b> | <b>496.2341</b>  | 8  |
| 5  | 672.2988         | 336.6530        | 655.2722  | 328.1397         | 654.2882        | 327.6477         | Q    | 896.3873         | 448.6973        | <b>879.3608</b> | 440.1840         | <b>878.3768</b> | 439.6920         | 7  |
| 6  | <b>769.3515</b>  | 385.1794        | 752.3250  | 376.6661         | 751.3410        | 376.1741         | P    | <b>768.3288</b>  | 384.6680        | 751.3022        | 376.1547         | 750.3182        | 375.6627         | 6  |
| 7  | 936.3499         | 468.6786        | 919.3233  | 460.1653         | 918.3393        | 459.6733         | S    | 671.2760         | 336.1416        | 654.2494        | 327.6284         | 653.2654        | 327.1363         | 5  |
| 8  | <b>1023.3819</b> | 512.1946        | 1006.3554 | 503.6813         | 1005.3713       | 503.1893         | S    | 504.2776         | <b>252.6425</b> | 487.2511        | 244.1292         | 486.2671        | <b>243.6372</b>  | 4  |
| 9  | 1136.4660        | 568.7366        | 1119.4394 | 560.2234         | 1118.4554       | 559.7313         | L    | 417.2456         | 209.1264        | 400.2191        | 200.6132         | 399.2350        | 200.1212         | 3  |
| 10 | <b>1265.5086</b> | 633.2579        | 1248.4820 | 624.7446         | 1247.4980       | 624.2526         | E    | <b>304.1615</b>  | 152.5844        | 287.1350        | 144.0711         | 286.1510        | 143.5791         | 2  |
| 11 |                  |                 |           |                  |                 |                  | R    | 175.1190         | 88.0631         | 158.0924        | 79.5498          |                 |                  | 1  |

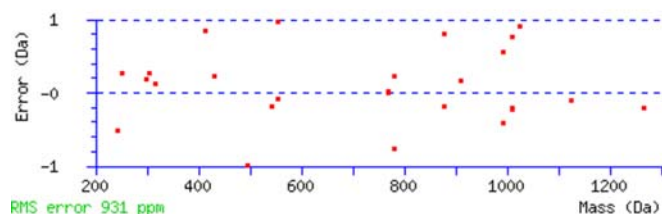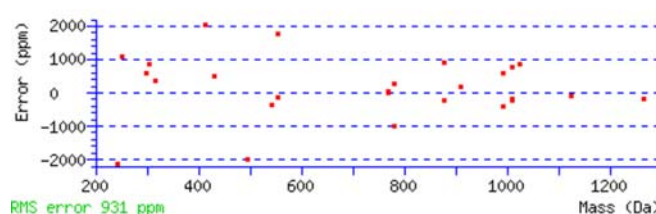

NCBI BLAST search of [WEDLQPSSLER](#)

(Parameters: blastp, nr protein database, expect=20000, no filter, PAM30)

Other BLAST [web gateways](#)

All matches to this query

| Score | $M_r(\text{calc})$ : | Delta  | Sequence                    |
|-------|----------------------|--------|-----------------------------|
| 31.2  | 1438.6129            | 0.0008 | <a href="#">WEDLQPSSLER</a> |

|      |           |         |                               |
|------|-----------|---------|-------------------------------|
| 30.0 | 1438.6129 | 0.0008  | <a href="#">WEDLQPSSLER</a>   |
| 4.7  | 1437.6166 | 0.9971  | <a href="#">NENYKSLVRR</a>    |
| 4.2  | 1438.6082 | 0.0056  | <a href="#">LPCHENQECPR</a>   |
| 3.6  | 1437.6095 | 1.0043  | <a href="#">VATPPPSAQPWK</a>  |
| 3.0  | 1438.6129 | 0.0008  | <a href="#">EGEPWSGAAAASK</a> |
| 2.6  | 1437.6072 | 1.0066  | <a href="#">SHVDSKCEQIR</a>   |
| 1.8  | 1438.6159 | -0.0022 | <a href="#">TAYKFAKSHAR</a>   |
| 0.5  | 1438.6129 | 0.0008  | <a href="#">GLYKESGSAYER</a>  |
| 0.0  | 1438.6089 | 0.0048  | <a href="#">SDISQPASQDGVR</a> |

Mascot: <http://www.matrixscience.com/>

# MASCOT SCIENCE Mascot Search Results

## Peptide View

MS/MS Fragmentation of **SAGSRLTSLGR**

Found in **IP100111183**, Tax\_Id=10090 Gene\_Symbol=Npr1 Atrial natriuretic peptide receptor A

Match to Query 600: 1263.537724 from(632.776138,2+)

Title: orbitrap002311.1180.1180.2.dta

Data file C:\Dokumente und Einstellungen\Juliane\Eigene Dateien\Orbitrap-Files\orbitrap002311.RAW.mgf

Click mouse within plot area to zoom in by factor of two about that point

Or,   to  Da

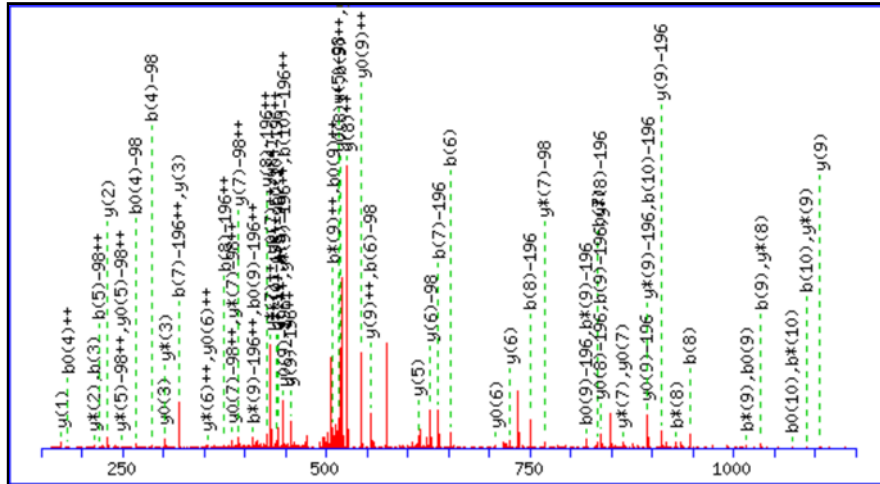

Monoisotopic mass of neutral peptide Mr(calc): 1263.5374

Fixed modifications: Carbamidomethyl (C)

Variable modifications:

S4 : Phospho (ST), with neutral losses 97.9769(shown in table), 0.0000

T7 : Phospho (ST), with neutral losses 97.9769(shown in table), 0.0000

Ions Score: 33 Expect: 0.017

Matches (Bold Red): 75/184 fragment ions using 101 most intense peaks

| #  | b               | b <sup>++</sup> | b*              | b <sup>*++</sup> | b <sup>0</sup>  | b <sup>0++</sup> | Seq. | y               | y <sup>++</sup> | y*              | y <sup>*++</sup> | y <sup>0</sup>  | y <sup>0++</sup> | #  |
|----|-----------------|-----------------|-----------------|------------------|-----------------|------------------|------|-----------------|-----------------|-----------------|------------------|-----------------|------------------|----|
| 1  | 88.0393         | 44.5233         |                 |                  | 70.0287         | 35.5180          | S    |                 |                 |                 |                  |                 |                  | 11 |
| 2  | 159.0764        | 80.0418         |                 |                  | 141.0659        | 71.0366          | A    | 981.5588        | 491.2830        | 964.5323        | 482.7698         | 963.5483        | 482.2778         | 10 |
| 3  | <b>216.0979</b> | 108.5526        |                 |                  | 198.0873        | 99.5473          | G    | <b>910.5217</b> | <b>455.7645</b> | <b>893.4952</b> | <b>447.2512</b>  | <b>892.5111</b> | <b>446.7592</b>  | 9  |
| 4  | <b>285.1193</b> | 143.0633        |                 |                  | <b>267.1088</b> | 134.0580         | S    | 853.5002        | <b>427.2538</b> | <b>836.4737</b> | 418.7405         | <b>835.4897</b> | 418.2485         | 8  |
| 5  | <b>441.2204</b> | <b>221.1139</b> | 424.1939        | 212.6006         | 423.2099        | 212.1086         | R    | 784.4788        | <b>392.7430</b> | <b>767.4522</b> | <b>384.2298</b>  | 766.4682        | <b>383.7378</b>  | 7  |
| 6  | <b>554.3045</b> | 277.6559        | 537.2780        | 269.1426         | 536.2939        | 268.6506         | L    | <b>628.3777</b> | 314.6925        | 611.3511        | 306.1792         | 610.3671        | 305.6872         | 6  |
| 7  | <b>637.3416</b> | <b>319.1744</b> | 620.3151        | 310.6612         | 619.3311        | 310.1692         | T    | <b>515.2936</b> | 258.1504        | 498.2671        | <b>249.6372</b>  | 497.2831        | <b>249.1452</b>  | 5  |
| 8  | <b>750.4257</b> | <b>375.7165</b> | 733.3991        | 367.2032         | 732.4151        | 366.7112         | L    | <b>432.2565</b> | 216.6319        | 415.2300        | 208.1186         | 414.2459        | 207.6266         | 4  |
| 9  | <b>837.4577</b> | 419.2325        | <b>820.4312</b> | <b>410.7192</b>  | <b>819.4471</b> | <b>410.2272</b>  | S    | <b>319.1724</b> | 160.0899        | <b>302.1459</b> | 151.5766         | <b>301.1619</b> | 151.0846         | 3  |
| 10 | <b>894.4792</b> | <b>447.7432</b> | 877.4526        | <b>439.2300</b>  | 876.4686        | <b>438.7379</b>  | G    | <b>232.1404</b> | 116.5738        | <b>215.1139</b> | 108.0606         |                 |                  | 2  |
| 11 |                 |                 |                 |                  |                 |                  | R    | <b>175.1190</b> | 88.0631         | 158.0924        | 79.5498          |                 |                  | 1  |

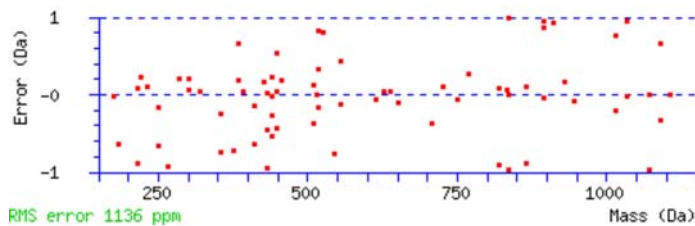

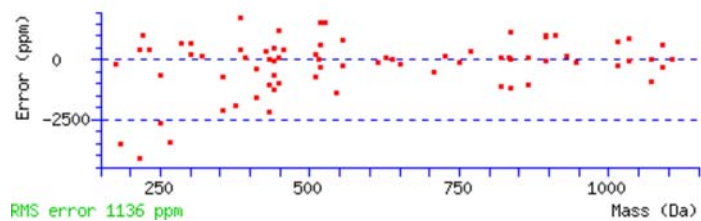

NCBI BLAST search of [SAGSRLTLGR](#)

(Parameters: blastp, nr protein database, expect=20000, no filter, PAM30)

Other BLAST [web gateways](#)

**All matches to this query**

| Score | Mr(calc): | Delta  | Sequence                      |
|-------|-----------|--------|-------------------------------|
| 32.8  | 1263.5374 | 0.0004 | <a href="#">SAGSRLTLGR</a>    |
| 30.2  | 1263.5374 | 0.0004 | <a href="#">SAGSRLTLGR</a>    |
| 25.0  | 1263.5374 | 0.0004 | <a href="#">SAGSRLTLGR</a>    |
| 22.5  | 1263.5374 | 0.0004 | <a href="#">SAGSRLTLGR</a>    |
| 22.3  | 1263.5374 | 0.0004 | <a href="#">SAGSRLTLGR</a>    |
| 16.6  | 1263.5374 | 0.0004 | <a href="#">SAGSRLTLGR</a>    |
| 10.5  | 1262.5309 | 1.0069 | <a href="#">LSLTEEKQR</a>     |
| 9.5   | 1263.5357 | 0.0020 | <a href="#">APGGSRASPGDGR</a> |
| 9.0   | 1262.5309 | 1.0068 | <a href="#">TLVLQTSEGR</a>    |
| 8.8   | 1263.5373 | 0.0004 | <a href="#">XKKSAQSSVR</a>    |

Mascot: <http://www.matrixscience.com/>

# **MASCOT** SCIENCE Mascot Search Results

## Peptide View

MS/MS Fragmentation of **TYWLLGER**

Found in **IPI00111183**, Tax\_Id=10090 Gene\_Symbol=Npr1 Atrial natriuretic peptide receptor A

Match to Query 385: 1116.503724 from(559.259138,2+)

Title: orbitrap002311.2082.2082.2.dta

Data file C:\Dokumente und Einstellungen\Juliane\Eigene Dateien\Orbitrap-Files\orbitrap002311.RAW.mgf

Click mouse within plot area to zoom in by factor of two about that point

Or, Plot from  to  Da

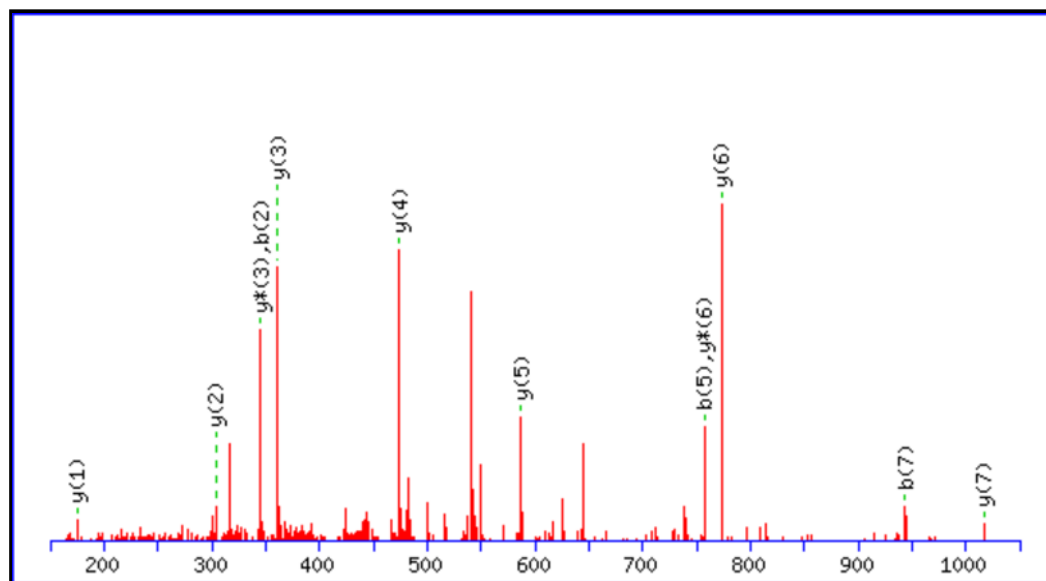

Monoisotopic mass of neutral peptide **Mr(calc):** 1116.5005

Fixed modifications: Carbamidomethyl (C)

Variable modifications:

Y2 : Phospho (Y)

Ions Score: 54 Expect: 0.0001

Matches (**Bold Red**): 12/68 fragment ions using 18 most intense peaks

| # | b               | b <sup>++</sup> | b <sup>0</sup> | b <sup>0++</sup> | Seq.     | y                | y <sup>++</sup> | y*              | y <sup>*++</sup> | y <sup>0</sup> | y <sup>0++</sup> | #        |
|---|-----------------|-----------------|----------------|------------------|----------|------------------|-----------------|-----------------|------------------|----------------|------------------|----------|
| 1 | 102.0550        | 51.5311         | 84.0444        | 42.5258          | <b>T</b> |                  |                 |                 |                  |                |                  | <b>8</b> |
| 2 | <b>345.0846</b> | 173.0459        | 327.0740       | 164.0407         | <b>Y</b> | <b>1016.4601</b> | 508.7337        | 999.4336        | 500.2204         | 998.4495       | 499.7284         | <b>7</b> |
| 3 | 531.1639        | 266.0856        | 513.1534       | 257.0803         | <b>W</b> | <b>773.4305</b>  | 387.2189        | <b>756.4039</b> | 378.7056         | 755.4199       | 378.2136         | <b>6</b> |
| 4 | 644.2480        | 322.6276        | 626.2374       | 313.6223         | <b>L</b> | <b>587.3511</b>  | 294.1792        | 570.3246        | 285.6659         | 569.3406       | 285.1739         | <b>5</b> |
| 5 | <b>757.3320</b> | 379.1697        | 739.3215       | 370.1644         | <b>L</b> | <b>474.2671</b>  | 237.6372        | 457.2405        | 229.1239         | 456.2565       | 228.6319         | <b>4</b> |
| 6 | 814.3535        | 407.6804        | 796.3429       | 398.6751         | <b>G</b> | <b>361.1830</b>  | 181.0951        | <b>344.1565</b> | 172.5819         | 343.1724       | 172.0899         | <b>3</b> |
| 7 | <b>943.3961</b> | 472.2017        | 925.3855       | 463.1964         | <b>E</b> | <b>304.1615</b>  | 152.5844        | 287.1350        | 144.0711         | 286.1510       | 143.5791         | <b>2</b> |
| 8 |                 |                 |                |                  | <b>R</b> | <b>175.1190</b>  | 88.0631         | 158.0924        | 79.5498          |                |                  | <b>1</b> |

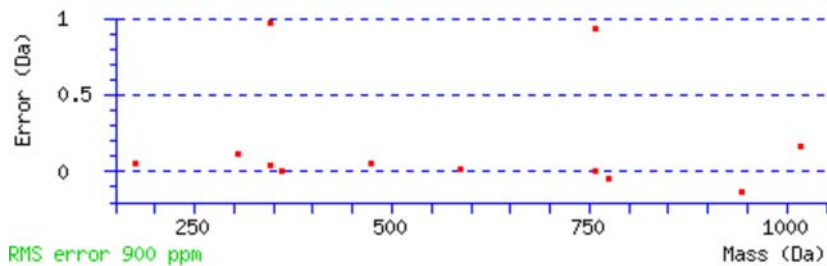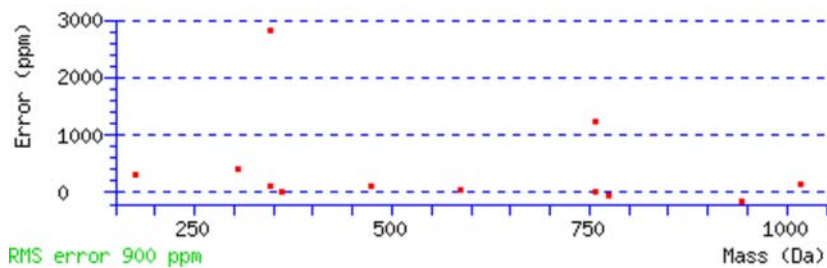

NCBI BLAST search of [TYWLLGER](#)

(Parameters: blastp, nr protein database, expect=20000, no filter, PAM30)

Other BLAST [web gateways](#)

**All matches to this query**

| Score | Mr(calc): | Delta   | Sequence                   |
|-------|-----------|---------|----------------------------|
| 54.0  | 1116.5005 | 0.0032  | <a href="#">TYWLLGER</a>   |
| 38.0  | 1116.5005 | 0.0032  | <a href="#">TYWLLGER</a>   |
| 12.9  | 1115.5012 | 1.0025  | <a href="#">SKEFALADR</a>  |
| 10.9  | 1115.5012 | 1.0025  | <a href="#">VSGVGIDYAR</a> |
| 8.3   | 1116.5077 | -0.0040 | <a href="#">ATNYGSRLR</a>  |
| 8.1   | 1115.5012 | 1.0025  | <a href="#">VQDLFTSAR</a>  |
| 8.1   | 1115.5012 | 1.0025  | <a href="#">VQDLFTSAR</a>  |
| 5.7   | 1115.5043 | 0.9994  | <a href="#">LCAEHGHHR</a>  |
| 5.3   | 1115.5012 | 1.0025  | <a href="#">AGPIFTTSR</a>  |
| 4.4   | 1116.5087 | -0.0050 | <a href="#">EDTGYYTLR</a>  |

Mascot: <http://www.matrixscience.com/>
