# Supplementary material for: Homologous desensitization of guanylyl cyclase A, the receptor for atrial natriuretic peptide, is associated with a complex phosphorylation pattern
Source: PubMed Central journal article supplement (PMC2901513; doi:10.1111/j.1742-4658.2010.07658.x), 2010-06
Supplement: ejb0277-2440-SD4.pdf [file ejb0277-2440-SD4.pdf]

**Supplementary Table S1:** Site-directed mutagenesis. Oligonucleotides and PCR reactions used to generate the plasmid for expression of GC-A S487E.

| Number | Name           | Sequence                                                | T <sub>m</sub> [°C] |
|--------|----------------|---------------------------------------------------------|---------------------|
| 1      | S487A/E fwd I  | ctg gcc tct ggg ata tcc acc tc                          | 66.0°C              |
| 4      | S487A/E rev II | ctt agg gca atc tcc tgc agg atg                         | 64.4°C              |
| 5      | S487E fwd II   | gag tta gaa cgc cac tta cgg agc gct ggc agc cgg ctg acc | 80.2°C              |
| 6      | S487E rev I    | gtg gcg ttc taa ctc gct ggg ctg caa gtc ctc cca gcg cac | 80.2°C              |

**Legend to supplemental Table S1:**

The wild type FLAG-tagged GC-A from rat in pCMV5 expression vector was used as a template for PCR mediated mutagenesis of serine 487 to glutamate. Two independent PCRs (PCR I: primer 1 + primer 4; PCR II: primer 2 + primer 3) were set up at an annealing temperature of 55 °C using 5 ng of template DNA, a final primer concentration of 20 pM and 1 unit of Taq DNA Polymerase (Invitrogen, Karlsruhe, Germany). PCR products were separated by gel electrophoresis and extracted using a commercial available kit (Macherey-Nagel, Düren, Germany). The products of PCRI (~ 250bp) and PCRII (~ 650bp) were fused to generate a DNA strain carrying the S487E mutation. Briefly, a 20 µl PCR reaction was set up with 1 µl of each PCR product, 1 unit of Taq DNA polymerase and 2 nM dNTP were annealed at 60°C. After 10 cycles reaction was cooled down to 4°C, 20 pM of primer 1 and primer 2 were added and the reaction was continued for 25 cycles. Q-Solution (Qiagen, Hilden, Germany) was added according to the manufacturer to all PCR reactions to improve the specificity. Fused PCR products (879bp) were purified by Chloroform/Isoamyl alcohol extraction. The pCMV5-FLAG-GC-A plasmid and the purified DNA strain carrying the expected mutation were subjected to double digestion with 5 units of EcoRV and SbfI (New England Biolabs, Frankfurt/Main, Germany) and ligated with the mutated strain using T4 DNA Ligase (New England Biolabs, Frankfurt/Main, Germany). Resulting constructs were verified through sequencing using internal primers.
